# Supplementary material
Source: Research Square preprint supplement (doi:10.21203/rs.3.rs-9198144/v1)
Supplement: Supplementary file 1 [file 05920763aed08d5a1b7be1b9.docx]

Table 1. Schedule of the *in situ* assay and treatment details for the treated and control colonies

| 8th July | 1st treatment: 500 mM lithiated sugar syrup, control: sugar syrup) |
| --- | --- |
| 11th July | mite count, 2nd treatment (500 mM lithiated sugar syrup), control: sugar syrup) |
| 14th July | mite count, 3rd treatment (500 mM lithiated sugar syrup), control: sugar syrup) |
| 17th July | mite count, 4th treatment (500 mM lithiated sugar syrup), control: sugar syrup) |
| 20th July | mite count, 5th treatment (500 mM lithiated sugar syrup), control: sugar syrup) |
| 23th July | mite count, 6th treatment (500 mM lithiated sugar syrup), control: sugar syrup) |
| 26th July | mite count, 7th treatment (500 mM lithiated sugar syrup), control: sugar syrup) |
| 29th July | mite count, 8th treatments; lithium treated: formic acid, control: 500 mM lithiated sugar syrup |
| 1st Aug | mite count |

**Table 2.** Parameters of the logistic growth curve models fitted to the *Tropilaelaps mercedesae* mortality data observed *ex situ* at different lithium chloride (LiCl) concentrations. The table details the sample size (n), the calculated model parameters (b and c), the coefficient of determination (R2) as a measure of fit, and the estimated time (in minutes) to reach 50% (*LC50*) and 90% (*LC*90) mortality for each concentration. *Indicates significant model with significant parameters at 0.001 significance level.

| **Concentration**  **(M)** | **n**  **(Model)** | **Model* parameters** | | **R2** | **Estimated time (min) to** | |
| --- | --- | --- | --- | --- | --- | --- |
| **b*** | **c*** | ***LC50*** | **LC90** |
| **5520** | 17 | 4.30292 | -0.02354 | 0.84800 | 62.00 | 155.35 |
| **2760** | 15 | 7.77210 | -0.01490 | 0.93682 | 137.64 | 285.13 |
| **1380** | 17 | 11.62979 | -0.01856 | 0.96535 | 132.19 | 250.56 |
| **690** | 16 | 7.54541 | -0.01298 | 0.77782 | 155.75 | 325.09 |
| **340** | 17 | 10.94717 | -0.01369 | 0.93517 | 174.81 | 335.32 |
| **170** | 18 | 6.75250 | -0.01759 | 0.69538 | 108.59 | 233.51 |
| **86** | 17 | 23.34345 | -0.01372 | 0.88593 | 229.56 | 389.67 |
| **43** | 16 | 5.63254 | -0.00685 | 0.87190 | 252.47 | 573.38 |
| **22** | 15 | 10.85744 | -0.00831 | 0.91464 | 286.86 | 551.15 |
| **11** | 9 | 15.87059 | -0.00576 | 0.92695 | 480.36 | 862.15 |
| **5** | 15 | 18.02969 | -0.00331 | 0.88276 | 873.67 | 1537.45 |
| **0** | 16 | 53.60572 | -0.00250 | 088656 | 1590.58 | 2468.31 |

**Table 3**. Robust statistical analysis (Welch and Brown–Forsythe tests) of the effect of lithium chloride concentration on the time (ln-transformed data) required to reach toxicological stages (tremor, locomotion loss, death) in *T. mercedesae*, including effect size (*Eta* squared). Note: (a, b, c) indicate concentrations significantly different from others, according to the Tamhane Post-Hoc tests.

| **Stages** |  | **Tremor** | **Loc 1** | **Loc 2** | **Death** |
| --- | --- | --- | --- | --- | --- |
| **Levene's Test  Based on Mean** | **Statistic** | 3.681 | 3.539 | 3.699 | 4.947 |
| **Sig.** | 0.000 | 0.000 | 0.000 | 0.000 |
| **Welch Test** | **Statistic** | 105.131 | 53.382 | 28.767 | 30.003 |
| **Sig.** | 0.000 | 0.000 | 0.000 | 0.000 |
| **Brown–Forsythe Test** | **Statistic** | 78.887 | 28.307 | 23.464 | 20.081 |
| **Sig.** | 0.000 | 0.000 | 0.000 | 0.000 |
| **Eta Squared** | | 0.833 | 0.630 | 0.592 | 0.554 |

**Table 4**. Cumulative *Tropilaelaps mercedesae* and *Varroa destructor* mite fall collected in three-day intervals from *in situ* treated (n=3; 500 mM lithium chloride trickling) and untreated control (n=1). Following the initial treatment (Day 0), six maintenance treatments were applied (Day 3–18), concluding with a crossover intervention on Day 21.

| Treatments: 1Initial;2Maintenance  3Phase shift; 4Terminal count | ***Tropilaelaps* mite fall** | | | | ***Varroa* mite fall** | | | |
| --- | --- | --- | --- | --- | --- | --- | --- | --- |
| *Treated* | *Treated* | *Treated* | Control | *Treated* | *Treated* | *Treated* | Control |
| ***1*** | ***2*** | ***3*** | **4** | ***1*** | ***2*** | ***3*** | **4** |
| day 0; 1st LiCl treatment1 | *-* | *-* | *-* | - | *-* | *-* | *-* | - |
| day 3; 2nd LiCl treatment2 | *176* | *132* | *327* | 62 | *7* | *15* | *0* | 2 |
| day 6; 3rd LiCl treatment2 | *207* | *115* | *126* | 67 | *2* | *6* | *0* | 1 |
| day 9; 4th LiCl treatment2 | *267* | *50* | *** | 63 | *0* | *3* | *** | 1 |
| day 12; 5th LiCl treatment2 | *196* | *67* | *182* | 49 | *0* | *5* | *3* | 1 |
| day 15; 6th LiCl treatment2 | *99* | *25* | *206* | 75 | *2* | *2* | *0* | 2 |
| day 18; 7th LiCl treatment2 | *18* | *13* | *190* | 86 | *0* | *1* | *0* | 4 |
| day 21; 8th (control) treatment3 | *8* | *9* | *184* | 120 | *0* | *2* | *2* | 3 |
| day 244 | *0* | *51* | *157* | 149 | *0* | *6* | *0* | 11 |
